# Supplementary material for: 1α,25-Dihydroxyvitamin D3 ameliorates diabetes-induced bone loss by attenuating FoxO1-mediated autophagy
Source: PubMed Central journal article supplement (PMC7948959; doi:10.1016/j.jbc.2021.100287), 2021-01-13
Supplement: mmc1.pdf [file mmc1.pdf]

**1 $\alpha$ ,25-Dihydroxyvitamin D3 ameliorates diabetes-induced bone loss by attenuating FoxO1-mediated autophagy**

Yixuan Jiang<sup>1,2</sup>, Wenqiong Luo<sup>1,2</sup>, Bin Wang<sup>1,2</sup>, Zumu Yi<sup>1</sup>, Ping Gong<sup>1,2</sup>, Yi Xiong<sup>1,2,\*</sup>

<sup>1</sup> State Key Laboratory of Oral Diseases, National Clinical Research Center for Oral Diseases, West China Hospital of Stomatology, Sichuan University, Chengdu, China

<sup>2</sup> Department of Oral Implantology, West China Hospital of Stomatology, Sichuan University, Chengdu, China

\* Corresponding author: Yi Xiong

E-mail: xiongraise@163.com (YX)

**Running title:** 1,25D prevents bone loss via FoxO1-mediated autophagy

**Keywords:** 1 $\alpha$ ,25-Dihydroxyvitamin D3 (1,25D), autophagy, forkhead transcription factor 1 (FoxO1), osteogenesis, diabetes mellitus

**Table S1 Detection of bone trabecular parameters in different groups.**

| Group      | BMD<br>(mg HA/cm <sup>3</sup> ) | BV/TV                      | Tb.N<br>(/mm)              | Tb.Sp<br>(mm)              |
|------------|---------------------------------|----------------------------|----------------------------|----------------------------|
| Ctrl       | 796.4 ± 16.35                   | 0.59 ± 0.11                | 7.60 ± 0.99                | 0.36 ± 0.07                |
| Ctrl-1,25D | 808.6 ± 25.87                   | 0.60 ± 0.05                | 7.20 ± 0.60                | 0.40 ± 0.03                |
| DM         | 708.3 ± 10.04 <sup>*#</sup>     | 0.21 ± 0.06 <sup>*#</sup>  | 3.16 ± 0.46 <sup>*#</sup>  | 0.84 ± 0.13 <sup>*#</sup>  |
| DM-1,25D   | 746.2 ± 15.07 <sup>*#S</sup>    | 0.37 ± 0.06 <sup>*#S</sup> | 4.64 ± 1.01 <sup>*#S</sup> | 0.66 ± 0.06 <sup>*#S</sup> |

\*p < 0.05, compared with Ctrl; #p < 0.05, compared with Ctrl-1,25D; \$p < 0.05, compared with DM. Ctrl: control; DM: diabetes mellitus; BMD: bone mineral density; BV/TV: bone volume per total volume; Tb.N: mean trabecular number; Tb.Sp: trabecular separation.

**Table S2 Serological tests in different groups.**

| Group      | Serum Alp<br>(U/L)         | Serum Ocn<br>(ng/ml)      | Serum glucose<br>(mg/dl)    |
|------------|----------------------------|---------------------------|-----------------------------|
| Ctrl       | 11.8 ± 2.77                | 273.3 ± 19.8              | 165.9 ± 14.4                |
| Ctrl-1,25D | 12.3 ± 1.56                | 295.0 ± 14.8              | 142.9 ± 18.4                |
| DM         | 4.58 ± 1.47 <sup>*#</sup>  | 96.8 ± 19.3 <sup>*#</sup> | 343.1 ± 20.9 <sup>*#</sup>  |
| DM-1,25D   | 8.04 ± 1.23 <sup>*#S</sup> | 185 ± 12.9 <sup>*#S</sup> | 263.6 ± 26.7 <sup>*#S</sup> |

\*p < 0.05, compared with Ctrl; #p < 0.05, compared with Ctrl-1,25D; \$p < 0.05, compared with DM. Ctrl: control; DM: diabetes mellitus; Alp: alkaline phosphatase; Ocn: osteocalcin.

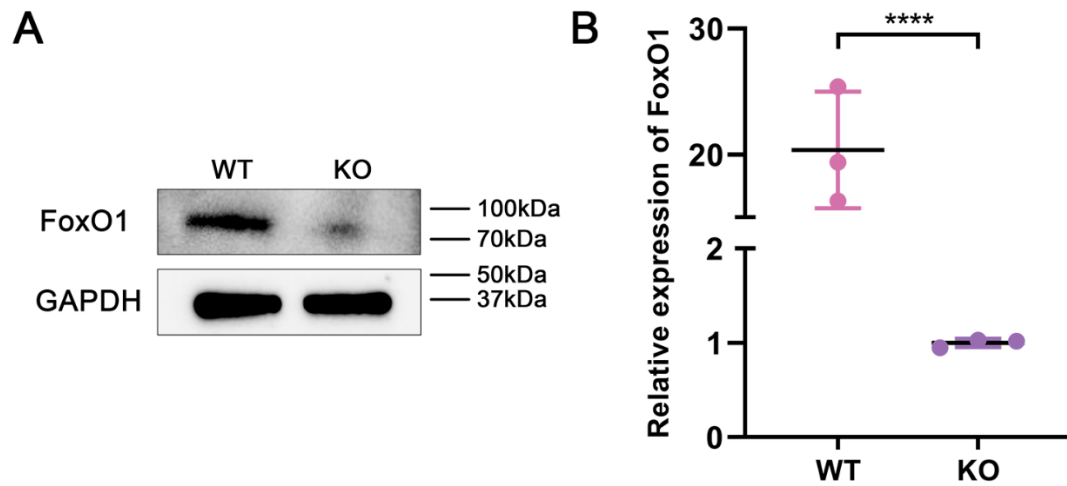

**Figure S1. Evidence of FoxO1 deletion *in vivo*.**

(A) Protein expression level of FoxO1 examined by Western blot. (B) The mRNA expression of FoxO1 tested using real time-qPCR. WT: wild type mice; KO: FoxO1<sup>OB<sup>-/-</sup></sup> mice.
